1 **High ribulose-1,5-bisphosphate carboxylase/oxygenase content in northern diatom**  
2 **species**

3

4 **A. C. Gerecht\*, G. K. Eriksen, M. Uradnikova, H. C.**  
5 **Eilertsen**

6 NFH, BFE, UiT-The Arctic University of Norway, P.O. Box  
7 6050 Langnes, 9037 Tromsø, Norway

8 \*Corresponding author:

9 *Andrea C. Gerecht*

10 *Tel: +47 776 44387*

11 *Email: andrea.gerecht@uit.no*

12

13 Ribulose-1,5-bisphosphate carboxylase/oxygenase (RuBisCO) is a fundamental enzyme in  
14 CO<sub>2</sub>-fixation in photoautotrophic organisms. Nonetheless, it has been recently suggested that  
15 the contribution of this enzyme to total cellular protein is low in phytoplankton, including  
16 diatoms (< 6%). Here we show that RuBisCO content is high in some diatom species isolated  
17 from northern waters (> 69°N). Two species contained the highest RuBisCO levels ever  
18 reported for phytoplankton (36% of total protein). These high RuBisCO requirements do not  
19 increase these species' requirements for nitrogen and do not impart a fitness disadvantage in  
20 terms of growth rate. On the contrary, high RuBisCO levels in psychrophilic diatoms may be  
21 a necessary mechanism to maintain high growth rates at low temperature at which enzymatic  
22 rates are low.

## 23 Introduction

24 Ribulose-1,5-bisphosphate carboxylase/oxygenase (RuBisCO) is a fundamental enzyme in  
25 photosynthetic organisms, and has been labelled as the most abundant protein on Earth<sup>1</sup>. It  
26 catalyses the first step in the dark reaction of photosynthesis by binding CO<sub>2</sub> to the precursor  
27 ribulose-1,5-bisphosphate. This process fixes inorganic carbon into organic matter. RuBisCO  
28 also carries out a competing oxygenase reaction, which leads to an overall loss of energy and  
29 organic matter from the cell in the process known as photorespiration. This can result in a loss  
30 of up to one third of fixed carbon in C<sub>3</sub>-plants<sup>2</sup>. The major factor determining the partitioning  
31 between carboxylase and oxygenase activity, besides the relative CO<sub>2</sub> and O<sub>2</sub> pressures, is the  
32 inherent ability of the enzyme to discriminate between the two substrates. This is described  
33 by the specificity factor ( $\tau = V_C \times K_O / V_O \times K_C$ ) and depends on the kinetic traits of the  
34 enzyme i.e. the maximum reaction rates ( $V_C$ ,  $V_O$ ) and half-saturation constants ( $K_C$ ,  $K_O$ ) of  
35 the carboxylase and oxygenase reaction, respectively. Different lineages of photosynthetic  
36 organisms express different RuBisCO subtypes based on their evolutionary origin<sup>3</sup>. Data for  
37 32 RuBisCO enzymes compiled by Badger *et al.*<sup>4</sup> from cyanobacteria, algae and higher plants  
38 show a 25-fold range in the specificity factor. Whereas the kinetic traits among subtypes have  
39 been assumed to vary considerably, they are considered to be conserved within a specific  
40 subtype<sup>5</sup>. However, high interspecific variability in the kinetic traits of RuBisCO has recently  
41 been described for diatoms<sup>6</sup>.

42 Diatoms are important primary producers, accounting for ca. 40% of marine primary  
43 production<sup>7</sup>. RuBisCO in diatoms has relatively high specificity for the carboxylase reaction,  
44 similar to what is found in optimized land plants such as wheat<sup>4,8</sup>. They furthermore possess  
45 an efficient carbon-concentrating mechanism (CCM) to assure high concentrations of CO<sub>2</sub>  
46 near the enzyme<sup>6</sup>. The combination of high CO<sub>2</sub>-availability and an efficiently functioning  
47 RuBisCO enzyme would decrease cellular requirements for RuBisCO. In fact, diatoms have  
48 been suggested to contain low amounts of the enzyme, between 2-6% of total soluble  
49 protein<sup>9</sup>.

50 The specificity factor is furthermore influenced by environmental factors such as  
51 temperature<sup>8</sup> and CO<sub>2</sub>-availability<sup>10</sup>. The specificity for the carboxylase reaction has been  
52 found to increase in four cold-water diatoms as the ambient temperature declines<sup>8</sup>. The  
53 oxygenase activity, on the other hand, is favoured by higher temperatures because of its  
54 higher activation energy<sup>11</sup> and by the fact that the solubility of O<sub>2</sub> decreases less than the  
55 solubility of CO<sub>2</sub> with increasing temperature. In turn, a more efficient utilization of the CO<sub>2</sub>  
56 substrate should be favoured by lower temperature, which may lower cellular requirements

57 for RuBisCO in microalgae from cold climates. In this study, we therefore analysed the  
58 amount of RuBisCO in five marine diatoms isolated from northern waters ( $> 69^{\circ}\text{N}$ ), spanning  
59 a wide range of cell sizes. We also compared RuBisCO requirements to species-specific  
60 nitrogen requirements.

61

## 62 **Results**

63 The growth rate ( $\mu$ ) was comparable among *A. longicornis*, *S. marinoi*, *C. furcellatus* and *P.*  
64 *glacialis* i.e. 0.25-0.28  $\text{d}^{-1}$  (Table 1). The large diatom *C. concinnus* had doubling rates ca.  
65 one-third lower ( $0.18 \pm 0.08 \text{ d}^{-1}$ ). The cell concentrations at which the cultures were  
66 harvested (late exponential phase) depended on cell size with smaller species harvested at  
67 higher cell concentrations than larger species (Table 1). Residual nitrate concentrations were  
68 comparable for *A. longicornis*, *S. marinoi* and *P. glacialis* (Fig. 1, Table 2). However, the  
69 latter two species built up more biomass, in terms of chlorophyll *a* (chl *a*), than *A.*  
70 *longicornis*. *Chaetoceros furcellatus* built up a similar biomass concentration as *A.*  
71 *longicornis* using less nitrate, whereas the large diatom *C. concinnus* consumed ca.  $7 \times$  the  
72 amount of nitrate to build up ca. one-third of the biomass as the other species. The ratio of  
73 particulate organic carbon (POC) to nitrogen (PON; C:N-ratio) in the cells was similar among  
74 the smallest species and *P. glacialis*, whereas *C. concinnus* had a higher C:N-ratio (Table 2).  
75 *Porosira glacialis* contained high levels of RuBisCO, ca. 37% of total soluble protein (Fig.  
76 2a, Table 2). Similarly high RuBisCO levels were measured in one of the smallest species, *S.*  
77 *marinoi*, whereas low levels were measured in *A. longicornis* (ca. 5%). The largest diatom *C.*  
78 *concinnus* had an intermediate value (ca. 9%), close to that of *C. furcellatus* (ca. 10%). When  
79 RuBisCO amounts were normalized to chl *a*, *P. glacialis* stood out as the species with highest  
80 RuBisCO levels (Fig. 2b, Table 2). These were ca.  $80 \times$  higher than those of the other species  
81 with the exception of *S. marinoi*, which had intermediate levels.

82

## 83 **Discussion**

84 Recently, it has been suggested that phytoplankton, including diatoms, contains low amounts  
85 of the  $\text{CO}_2$ -fixing enzyme RuBisCO, below 6% of total soluble protein<sup>9</sup>. In the current study,  
86 only one diatom species, *A. longicornis*, contained similarly low amounts, whereas *C.*  
87 *furcellatus* and *C. concinnus* contained RuBisCO amounts within the range described  
88 previously for phytoplankton<sup>10</sup>. Two species, *P. glacialis* and *S. marinoi* contained strikingly  
89 high amounts of the enzyme, ca. 36% of total soluble protein. These high levels are similar to  
90 those found in land plants<sup>1</sup> and have never been reported for phytoplankton. The highest

91 previously reported levels are 23% in *Isochrysis galbana*, and most values are 5-10 times  
92 lower<sup>10</sup>. Considering the high interspecific variability observed in the current study, species  
93 differences may explain some of the differences among studies. Additionally, physiological  
94 differences among strains of the same species can be high in diatoms<sup>12,13</sup>.

95 Also when RuBisCO levels were normalized to chl *a*, *S. marinoi* and *P. glacialis* stood out in  
96 terms of high RuBisCO content, whereas the other three species had values similar to those  
97 previously reported for a cyanobacteria<sup>14</sup>. Despite these apparently high requirements for the  
98 RuBisCO enzyme, both *S. marinoi* and *P. glacialis* showed an efficient use of nitrate. The  
99 amount of nitrate necessary to build up the same amount of biomass in these two species was  
100 actually lower than in *A. longicornis* and *C. furcellatus* and considerably lower than in the  
101 large diatom *C. concinnus*. This statement assumes that chl *a* is a cell-size and species  
102 independent proxy for biomass. However, using final POC concentrations of the culture as a  
103 biomass proxy gave qualitatively the same results i.e. lower nitrate requirements in *S.*  
104 *marinoi* and *P. glacialis* despite high RuBisCO content. The low C:N-ratio determined in all  
105 species except for *C. concinnus* suggests a high cellular protein content, similar to those  
106 reported for Antarctic diatoms by Young *et al.*<sup>15</sup>. The higher C:N-ratio in *C. concinnus* may  
107 relate to the large size of this species and higher capacity for storing C-rich compounds such  
108 as carbohydrates or lipids. There was, however, no effect of RuBisCO requirements on  
109 protein content. This may relate to a lower requirement for a CCM at high cellular RuBisCO  
110 levels and a possible trade-off between resources invested into the CCM vs. RuBisCO<sup>5</sup>.

111 There are two solutions for psychrophilic organisms to overcome slow enzymatic rates at low  
112 temperatures. They can either evolve enzymes with lower thermal optima than mesophilic  
113 species or increase enzyme abundance. Descolas-Gros and de Billy<sup>16</sup> determined that the  
114 activation energy for RuBisCO is the same between Antarctic and temperate diatom species,  
115 suggesting minimal cold adaptation of the enzyme. Smith and Platt<sup>17</sup>, on the other hand,  
116 reported differences in the temperature response between RuBisCO from Arctic and tropical  
117 phytoplankton. Similarly, Young *et al.*<sup>15</sup> reported that the carboxylation rate of a mesophilic  
118 diatom decreased more strongly with decreasing temperature than that of a psychrophilic  
119 species. Both studies suggest a certain degree of cold adaptation of RuBisCO in  
120 psychrophilic diatoms. The main mechanism, however, allowing high carboxylase activity at  
121 low temperate seems to be increasing the amount of RuBisCO in the cell. The study by  
122 Young *et al.*<sup>15</sup> reports RuBisCO levels of up to 23% of total protein in an Antarctic diatom  
123 bloom with similarly high levels in a psychrophilic diatom cultured at 3°C. This contrasts the  
124 study by Losh *et al.*<sup>9</sup>, which reports RuBisCO levels of <1% total protein in field

125 phytoplankton samples from a temperate area. The high levels of RuBisCO reported in the  
126 current study may therefore relate to the necessity of maintaining carboxylase activity and  
127 thereby growth rate in cold-water areas and/or at low temperature in the laboratory. Similarly,  
128 psychrophilic green algae contain twice as much RuBisCO as their mesophilic counterparts<sup>18</sup>.  
129 Based on these studies it is tempting to draw the conclusion that our isolate of *A. longicornis*  
130 is a temperate strain transported northwards by inflowing Atlantic water, whereas the isolates  
131 of *P. glacialis* and *S. marinoi* used in this study are true cold-adapted strains.  
132 The next step is to determine to what extent RuBisCO levels are under genetic control by  
133 cultivating both meso- and psychrophilic species over a range of temperatures. Although care  
134 was taken to harvest all cultures under the same conditions, the high standard variation in *P.*  
135 *glacialis* and *S. marinoi*, the species with highest RuBisCO levels, may indicate a high degree  
136 of phenotypic plasticity. Preliminary data from a temperature experiment does indeed suggest  
137 lower RuBisCO levels in *S. marinoi* grow at a higher temperature (12°C; unpublished data).  
138 Similarly, Mortain-Bertrand *et al.*<sup>19</sup> showed that the carboxylase activity in *S. costatum*  
139 increases from 18 to 3°C.  
140 In conclusion, the current study provides further evidence that the strategy for psychrophilic  
141 diatoms for maintaining high growth rates at low temperature is to increase the amount of  
142 RuBisCO in the cells to allow for high carboxylase activity. It furthermore demonstrates that  
143 the requirement for RuBisCO varies strongly among diatom species. The RuBisCO levels  
144 reported here are the highest ever reported for phytoplankton. The regulation and possible  
145 constraint of these levels are areas that deserve further study.

146

## 147 **Methods**

### 148 **Experimental setup and sample collection**

149 The diatom species *Attheya longicornis* R. M. Crawford & C. Gardner, *Skeletonema marinoi*  
150 Sarno & Zingone, *Chaetoceros furcellatus* Yendo, *Porosira glacialis* (Grunow) Jørgensen  
151 and *Coscinodiscus concinnus* W. Smith were analysed for RuBisCO content using Western  
152 Blot. All species were either isolated from water samples or germinated from spore-  
153 containing sediment samples collected in the Barents Sea or along the coast of northern  
154 Norway (Table 1). Species were identified by a combination of morphological and molecular  
155 methods as described in Huseby<sup>20</sup>. Stock cultures for inoculation were kept in a climate-  
156 controlled room at 5°C and 50  $\mu\text{mol m}^{-2} \text{s}^{-1}$  scalar irradiance on a 14:10 h light:dark cycle in  
157 f/10-medium<sup>21</sup>. Experimental cultures were grown semi-continuously as two (*C. furcellatus*,  
158 *C. concinnus*, *S. marinoi*) or three biological replicates (*A. longicornis*, *P. glacialis*) in 100 l

159 Plexiglas cylinders under the same temperature and light conditions as stock cultures by  
160 repeatedly harvesting up to 70 l of the culture and replenishing with the same volume of  
161 nutrient-replete culture medium. This was prepared from filtered (0.22  $\mu\text{m}$ ), pasteurized,  
162 local seawater (Tromsø sound, 25 m depth) by adding silicate (final concentration 12.3  $\mu\text{M}$ )  
163 and the commercial nutrient mixture Substral<sup>TM</sup> (0.25 ml l<sup>-1</sup>; The Scotts Company (Nordics)  
164 A/S, Denmark). This nutrient mixture was chosen due to the need for adding economically  
165 feasible amounts of nutrients to large culture volumes<sup>22</sup> and provided the following final  
166 concentrations: nitrate – 589.3  $\mu\text{M}$ , ammonia – 482.1  $\mu\text{M}$ , phosphate – 104.8  $\mu\text{M}$ . All  
167 cultures were aerated with compressed air to avoid sedimentation and CO<sub>2</sub>-limitation.  
168 Growth rates ( $\mu$ ; Table 1) were calculated as the difference in logarithmic values of *in vitro*  
169 chl *a* between the starting and sampling day. Chl *a* was measured as three technical replicates  
170 every 2-3 days by filtering 5 mL of the culture onto a GF/C-filter, extracting the filters with 5  
171 mL ethanol before measuring fluorescence on a TD-700 fluorometer before and after  
172 acidification. Fluorescence was converted to  $\mu\text{g l}^{-1}$  chl *a* according to Holm-Hansen and  
173 Riemann<sup>23</sup>. Cultures were harvested in late exponential phase (Table 1) by first concentrating  
174 cells onto a plankton net (mesh size 5-20  $\mu\text{m}$ ) before centrifuging at 3500 rpm for 5 min in a  
175 cooled centrifuge (4°C). Two technical replicates of the obtained wet pellet (ca. 400 mg each)  
176 was transferred into 2 ml Eppendorf tubes, flash-frozen in liquid N<sub>2</sub> and stored at -80°C until  
177 analysis. Cell density was determined every 2-3 days and upon harvest by allowing the cells  
178 contained in 2 ml of a culture sample to settle in 2 ml Nunc culture plates before counting  
179 them under an inverted microscope. Growth rates determined from cell counts provided  
180 similar but more variable results than chl *a* data (data not shown). Cell size (diameter,  
181 pervalvar axis; Table 1) was determined on the same microscope by means of an ocular  
182 graticulate calibrated with a stage micrometer.

183

#### 184 **Residual nitrate concentrations**

185 Residual nitrate concentrations were measured as three technical replicates in the culture  
186 media before diluting the cultures. The cells were removed from the sample by filtering 50  
187 ml through a GF/C filter. The samples were frozen and stored at -20°C until analysis on a  
188 Flow Solution IV analyzer, which was calibrated using reference seawater. Some of the  
189 residual nitrate concentrations were above the values calculated for initial nitrate  
190 concentrations in the culture medium based on nutrient addition (Table 2). This may be due  
191 to contamination from the natural seawater used to prepare the medium and/or the initial  
192 inoculum culture. The number of times that residual nitrate concentrations were measured in



193 the cultures differed among species and the values plotted in Fig. 1 are based on the  
194 following number of measurements (biological replicates  $\times$  dilution dates), *A. longicornis*:  
195  $n=6$ ; *C. furcellatus*:  $n=8$ ; *C. concinnus*:  $n=4$ ; *S. marinoi*:  $n=6$ ; *P. glacialis*:  $n=12$ .

196

### 197 **Elemental carbon to nitrogen ratios**

198 Three technical replicates of 50 mL each of culture was filtered onto precombusted (450°C, 8  
199 h) GF/C filters and dried at 60°C for 24 h. The amount of POC and PON was analysed on the  
200 whole filter using a 440 elemental analyser and calibrated against standard reference material  
201 (acetanilide).

202

### 203 **Sample extraction and total protein analysis**

204 To extract total soluble protein, pellet samples were suspended (1 ml: 1 g sample) in  
205 extraction buffer (50 mM MES-NaOH pH=7.0, 10 mM MgCl<sub>2</sub>, 1 mM EDTA, 1 mM EGTA,  
206 1% Tween 80) containing 10 mM of the reducing agent DTT and 3% protease inhibitor  
207 cocktail. Samples were then extracted by two sonication-freeze cycles using a handheld  
208 ultrasonifier with a microtip at 20% output until the sample was just thawed before refreezing  
209 in liquid N<sub>2</sub>. Measurements of total soluble protein and RuBisCO levels after various  
210 sonication-freeze cycles confirmed that two cycles were sufficient to extract all soluble  
211 protein and RuBisCO from the samples, whereas additional cycles increased the likelihood of  
212 degradation (data not shown). The extract was centrifuged for 10 min at 10.000 g in a cooled  
213 centrifuge to remove debris and kept continuously on ice until further analysis. Total protein  
214 concentrations in the extract were measured by a reagent-compatible method (2-D Quant kit;  
215 GE Healthcare, USA).

216

### 217 **Western Blot analysis**

218 0.05-2  $\mu$ g of total protein were loaded onto 4-12% SDS-PAGE gels for electrophoresis using  
219 either the NuPAGE (Thermo Fisher Sci.) or Bio-Rad system (Bio-Rad, USA). For each  
220 sample two technical replicates of at least two differing protein loads were analysed.  
221 Appropriate aliquots of extract were diluted with extraction buffer before adding 1x LDS  
222 sample buffer and heating for 10 min at 70°C to denature proteins. Proteins were separated at  
223 200 V for 30-45 min in 1x Tris/HEPES/SDS running buffer. After separation, proteins were  
224 transferred onto a PDVF membrane using either the NuPAGE wet transfer system (1 h at 60  
225 V in Tris/glycine transfer buffer) or a semi-dry transfer system (Trans-Blot Turbo; Bio-Rad).  
226 The membrane was blocked with 5% skim milk in Tris-buffered saline/Tween 20 (TBST)

227 buffer for 1 h at room temperature on a shaking table. The membrane was then incubated  
228 overnight at 4°C with a primary global antibody for RuBisCO (1:5000; AS03 037; Agrisera,  
229 Sweden), washed 3 times 5 min in TBST and then incubated for 1 h at room temperature with  
230 a goat anti-rabbit IgG HRP-conjugated secondary antibody (1:10000; AS09 602). The  
231 membrane was then washed as above and developed with SuperSignal West Pico  
232 Chemiluminescent substrate using an image station. A range of 3-4 standards (AS01 017S or  
233 purified diatom RuBisCO) was run alongside the samples for quantification and sample  
234 values were only considered if they fell within the standard range. As the primary antibody is  
235 designed against the large subunit of RuBisCO (RbcL), the RuBisCO amount was adjusted  
236 for the small subunit of RuBisCO (RbcS), except when using purified diatom RuBisCO as  
237 standard. RbcL amounts in the samples were quantified by direct comparison of band  
238 intensities with the standards using the system's own software. To account for the  
239 contribution of RbcS, nanograms of RbcS were calculated using equimolar picomoles and a  
240 molecular weight of 15 kDa<sup>9</sup>. The number of replicates (biological × technical replicates)  
241 considered for the species was as follows, *A. longicornis*: n=13; *C. furcellatus*: n=14; *C.*  
242 *concinus*: n=7; *S. marinoi*: n=9; *P. glacialis*: n=16.

243

#### 244 **Acknowledgements**

245 We would like to thank Svein Kristiansen for running the nitrate analyses and Paul Dubourg  
246 for carrying out the elemental CN-analyses. We would furthermore like to thank Inger  
247 Andersson for providing us with purified diatom RuBisCO.

248

#### 249 **References**

- 250 1 Ellis, R. J. The most abundant protein in the world. *Trends Biochem. Sci.* **4**, 241-244  
251 (1979).
- 252 2 Monteith, J. L. Climate and efficiency of crop production in Britain. *Philos. T. R. Soc.*  
253 *B* **281**, 277-294 (1977).
- 254 3 Tabita, F. R., Satagopan, S., Hanson, T. E., Kreel, N. E. & Scott, S. S. Distinct form I,  
255 II, III, and IV rubisco proteins from the three kingdoms of life provide clues about  
256 rubisco evolution and structure/function relationships. *J. Exp. Bot.* **59**, 1515-1524  
257 (2008).
- 258 4 Badger, M. R. *et al.* The diversity and coevolution of rubisco, plastids, pyrenoids, and  
259 chloroplast-based CO<sub>2</sub>-concentrating mechanisms in algae. *Can. J. Bot.* **76**, 1052-  
260 1071 (1998).



- 261 5 Young, J. N. & Hopkinson, B. M. The potential for co-evolution of CO<sub>2</sub>-  
262 concentrating mechanisms and rubisco in diatoms. *J. Exp. Bot.* **68**, 3751-3762 (2017).
- 263 6 Young, J. N. *et al.* Large variation in the rubisco kinetics of diatoms reveals diversity  
264 among their carbon-concentrating mechanisms. *J. Exp. Bot.* **67**, 3445-3456 (2016).
- 265 7 Nelson, D. M., Tréguer, P., Brzezinski, M. A., Leynaert, A. & Quéguiner, B.  
266 Production and dissolution of biogenic silica in the ocean: revised global estimates,  
267 comparison with regional data and relationship to biogenic sedimentation. *Global*  
268 *Biogeochem. Cy.* **9**, 359-372 (1995).
- 269 8 Haslam, R. P. *et al.* Specificity of diatom rubisco in *Plant Responses To Air Pollution*  
270 *And Global Change* (eds. Omasa, K., Nouchi, I. & de Kok, L. J.) 157-164 (Springer,  
271 2005).
- 272 9 Losh, J. L., Young, J. N. & Morel, F. M. M. Rubisco is a small fraction of total  
273 protein in marine phytoplankton. *New Phytol.* **198**, 52-58 (2013).
- 274 10 Raven, J. A. Physiology of inorganic C acquisition and implications for resource use  
275 efficiency by marine phytoplankton: relation to increased CO<sub>2</sub> and temperature. *Plant*  
276 *Cell Environ.* **14**, 779-794 (1991).
- 277 11 Parry, M. A. J., Madgwick, P. J., Carvalho, J. F. C. & Andralojc, P. J. Prospects for  
278 increasing photosynthesis by overcoming the limitations of rubisco. *J. Agr. Sci.* **145**,  
279 31-43 (2007).
- 280 12 Gerecht, A. *et al.* Oxylinin production during a mesocosm bloom of *Skeletonema*  
281 *marinoi*. *J. Exp. Mar. Biol. Ecol.* **446**, 159-165 (2013).
- 282 13 Godhe, A. & Rynearson, T. A. The role of intraspecific variation in the ecological and  
283 evolutionary success of diatoms in changing environments. *Philos. T. R. Soc. B* **372**,  
284 20160399; 10.1098/rstb.2016.0399 (2017).
- 285 14 Brown, C. M., MacKinnon, J. D., Cockshutt, A. M., Villareal, T. A. & Campbell, D.  
286 A. Flux capacities and acclimation costs in *Trichodesmium* from the Gulf of Mexico.  
287 *Mar. Biol.* **154**, 413-422 (2008).
- 288 15 Young, J. N., Goldman, J. A. L., Kranz, S. A., Tortell, P. D. & Morel, F. M. M. Slow  
289 carboxylation of rubisco constrains the rate of carbon fixation during antarctic  
290 phytoplankton blooms. *New Phytol.* **205**, 172-181; 10.1111/nph.13021 (2015).
- 291 16 Descolas-Gros, C. & de Billy, G. Temperature adaptation of RuBP carboxylase:  
292 kinetic properties in marine antarctic diatoms. *J. Exp. Mar. Biol. Ecol.* **108**, 147-158  
293 (1987).

- 294 17 Smith, J. C. & Platt, T. Temperature responses of ribulose bisphosphate carboxylase  
295 and photosynthetic capacity in arctic and tropical phytoplankton. *Mar. Ecol. Prog.  
296 Ser.* **25**, 31-37 (1985).
- 297 18 Devos, N., Ingouff, M., Loppes, R. & Matagne, R. F. Rubisco adaptation to low  
298 temperatures: a comparative study in psychrophilic and mesophilic unicellular algae.  
299 *J. Phycol.* **34**, 655-660 (1998).
- 300 19 Mortain-Bertrand, A., Descolas-Gros, C. & Jupin, H. Growth, photosynthesis and  
301 carbon metabolism in the temperate marine diatom *Skeletonema costatum* adapted to  
302 low temperature and low photon-flux density. *Mar. Biol.* **100**, 135-141 (1988).
- 303 20 Huseby, S. Metabolic fingerprinting applied in diatom taxonomy. PhD thesis, UiT-  
304 The Arctic University of Tromsø (2012).
- 305 21 Guillard, R. R. L. Culture of phytoplankton for feeding marine invertebrates in  
306 *Culture Of Marine Invertebrate Animals* (ed. Smith, W. L.) 29-60 (Plenum Press,  
307 1975).
- 308 22 Ingebrigtsen, R. A., Hansen, E., Andersen, J. H. & Eilertsen, H. C. Light and  
309 temperature effects on bioactivity in diatoms. *J. Appl. Phycol.* **28**, 939-950 (2016).
- 310 23 Holm-Hansen, O. & Riemann, B. Chlorophyll *a* determination - improvements in  
311 methodology. *Oikos* **30**, 438-447 (1978).

312

### 313 **Figure legends**

314

315 **Figure 1. Nitrate consumption in the five diatom species.** Residual nitrate concentrations  
316 plotted against final chlorophyll *a* concentrations in cultures of *A. longicornis*, *S. marinoi*, *C.*  
317 *furcellatus*, *P. glacialis*, and *C. concinnus*. Error bars indicate s.d. of the mean with number  
318 of replicates reported in the methods section.

319

320 **Figure 2. RuBisCO content in the five diatoms species. a** RuBisCO levels in *A.*  
321 *longicornis*, *C. furcellatus*, *C. concinnus*, *S. marinoi*, and *P. glacialis* as percentage of total  
322 soluble protein. **b** Picomoles of RbcL normalized to chlorophyll *a*; note the different y-axes  
323 for species with low RuBisCO levels (left half) and high levels (right half). Error bars  
324 indicate s.d. of the mean with number of replicates reported in the methods section.

325

326 **Table 1. Origin, cell size, growth rate and harvest cell concentrations of the five diatom**  
 327 **species. Means  $\pm$  s.d.**

|                       | Isolation site        | Cell diameter<br>[ $\mu\text{m}$ ] | Pervalvar axis<br>[ $\mu\text{m}$ ] | POC<br>[pg cell <sup>-1</sup> ] | $\mu$ [d <sup>-1</sup> ] | cells ml <sup>-1</sup><br>$\times 10^5$ |
|-----------------------|-----------------------|------------------------------------|-------------------------------------|---------------------------------|--------------------------|-----------------------------------------|
| <i>A. longicornis</i> | Norwegian coast, 70°N | 5.5<br>$\pm 1.1$                   | 11.5<br>$\pm 2.2$                   | 70.7<br>$\pm 6.5$               | 0.26<br>$\pm 0.06$       | 705<br>$\pm 168$                        |
| <i>S. marinoi</i>     | Norwegian coast, 70°N | 4.5<br>$\pm 0.7$                   | 9.5<br>$\pm 3.7$                    | 108.5<br>$\pm 12.1$             | 0.26<br>$\pm 0.01$       | 641<br>$\pm 135$                        |
| <i>C. furcellatus</i> | Barents Sea, 78°N     | 4.5<br>$\pm 0.7$                   | 13.0<br>$\pm 2.1$                   | 130.3<br>$\pm 10.3$             | 0.28<br>$\pm 0.01$       | 542<br>$\pm 179$                        |
| <i>P. glacialis</i>   | Barents Sea, 80°N     | 33.5<br>$\pm 1.4$                  | 20.5<br>$\pm 2.7$                   | 3517<br>$\pm 887$               | 0.25<br>$\pm 0.02$       | 31.5<br>$\pm 3.1$                       |
| <i>C. concinnus</i>   | Norwegian coast, 70°N | 141.3<br>$\pm 2.5$                 | 145.0<br>$\pm 4.1$                  | 87871<br>$\pm 1871$             | 0.18<br>$\pm 0.08$       | 0.315<br>$\pm 0.034$                    |

328 **Table 2. Nitrate consumption and RuBisCO content of the five diatom species. Means ±**  
 329 **s.d.**

|                       | Residual NO <sub>3</sub><br>[μM] | Final chl <i>a</i><br>[μg l <sup>-1</sup> ] | C:N (a:a)      | RuBisCO<br>[% total prot.] | RuBisCO<br>[pmol nmol <sup>-1</sup> chl <i>a</i> ] |
|-----------------------|----------------------------------|---------------------------------------------|----------------|----------------------------|----------------------------------------------------|
| <i>A. longicornis</i> | 434.3<br>± 101.7                 | 127.8<br>± 50.2                             | 4.44<br>± 0.14 | 5.2<br>± 3.5               | 3.2<br>± 1.6                                       |
| <i>S. marinoi</i>     | 474.5<br>± 31.0                  | 253.4<br>± 136.3                            | 4.17<br>± 0.22 | 35.8<br>± 29.4             | 41.2<br>± 24.7                                     |
| <i>C. furcellatus</i> | 604.5<br>± 185.7                 | 131.0<br>± 53.3                             | 4.59<br>± 0.15 | 10.3<br>± 3.3              | 4.8<br>± 4.1                                       |
| <i>P. glacialis</i>   | 515.5<br>± 158.9                 | 342.9<br>± 214.9                            | 4.24<br>± 0.18 | 36.6<br>± 21.0             | 284.8<br>± 204.8                                   |
| <i>C. concinnus</i>   | 68.8<br>± 14.6                   | 60.1<br>± 14.5                              | 6.75<br>± 0.75 | 9.0<br>± 4.8               | 2.8<br>± 2.4                                       |

330

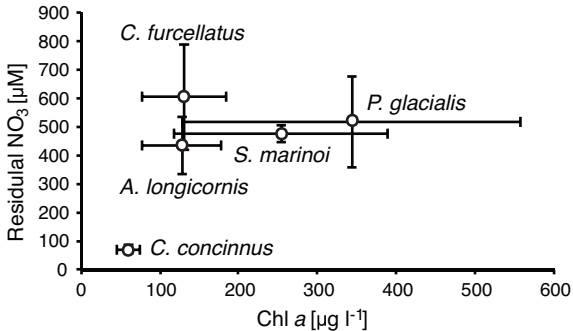

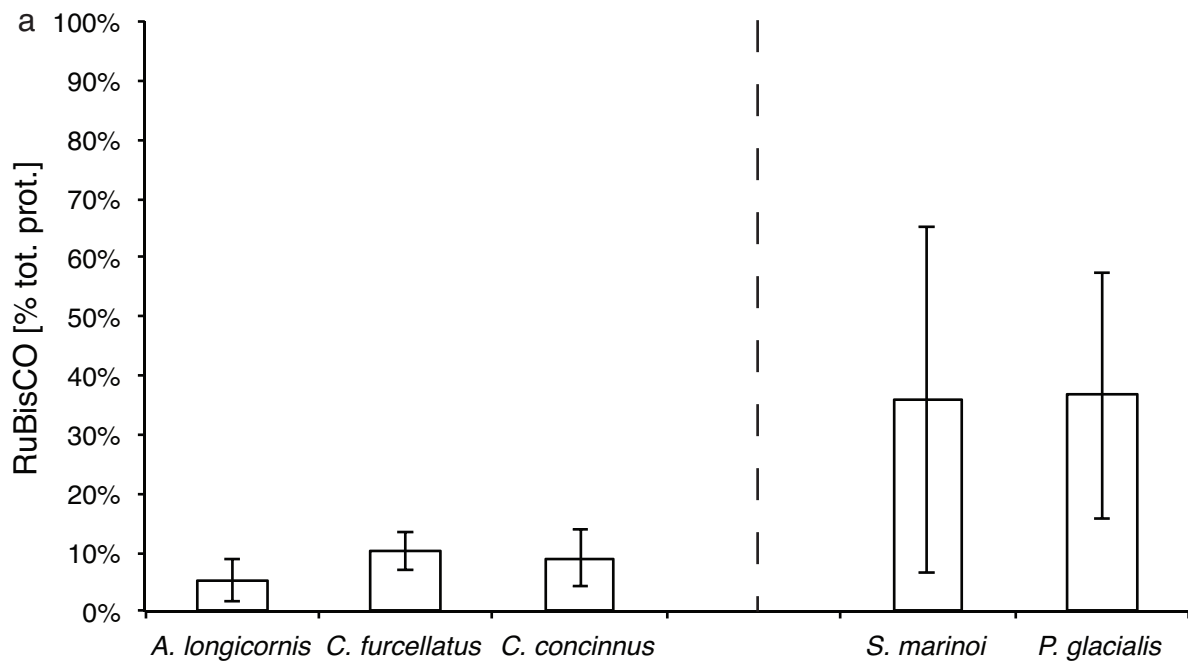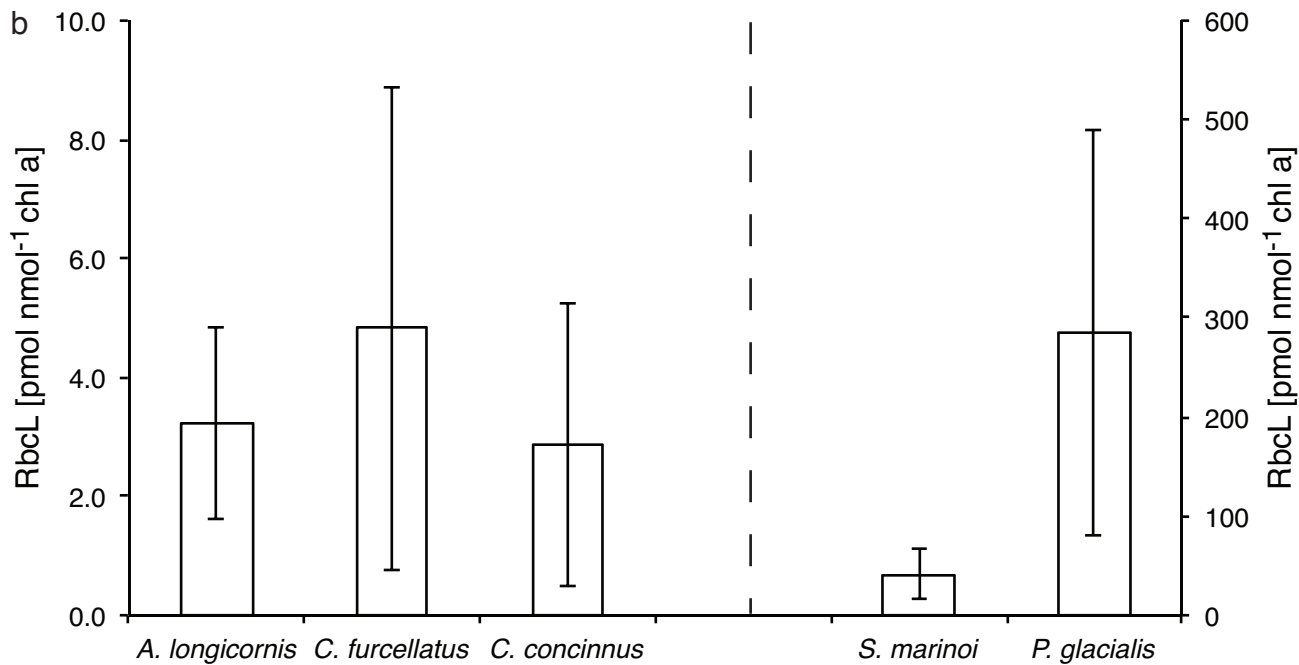

Source: https://www.biorxiv.org/content/biorxiv/early/2019/03/06/569285.full.pdf
